# Supplementary material for: A Resequencing-Based Ultradense Genetic Map of Hericium erinaceus for Anchoring Genome Sequences and Identifying Genetic Loci Associated With Monokaryon Growth
Source: Front Microbiol. 2020 Jan 31;10:3129. doi: 10.3389/fmicb.2019.03129 (PMC7005679; doi:10.3389/fmicb.2019.03129)
Supplement: TABLE S1 — Re-sequence data of 127 SSIs and 911-4. [file Table_1.XLSX]

## Sheet: re-sequence data
Table S1. Re-sequence data of 127 SSIs and 911-4
ID	Raw_Reads	Clean_Reads	Clean_Reads_Percent	Raw_Base	Clean_Base	Clean_Base_Percent	GC_Content	>Q30	RmDup_reads	Mapped_reads	Mapped_Rate	mean_coverge	mean_mapping_quality	1X_coverage	10X_coverage	nNonRefHom
1_1	7830594	7649432	0.9769	1174589100(1.17G)	1139736886(1.14G)	0.9703	0.4072	0.9292	6487212	6282964	0.9685	22.254X	44.0057	0.9293	0.7434	352934
1_11	7606606	7393812	0.972	1140990900(1.14G)	1104700046(1.10G)	0.9682	0.4365	0.9256	6181692	5900366	0.9545	20.8735X	43.8603	0.9246	0.7853	362246
1_12	9865072	9645378	0.9777	1479760800(1.48G)	1441956006(1.44G)	0.9745	0.45	0.924	7966327	7538517	0.9463	26.526X	43.3878	0.8896	0.8307	572962
1_13	7553888	7311466	0.9679	1133083200(1.13G)	1089503772(1.09G)	0.9615	0.3554	0.9226	6364303	6137719	0.9644	21.7007X	43.2004	0.8924	0.4883	551850
1_14	8562978	8359802	0.9763	1284446700(1.28G)	1247903732(1.25G)	0.9715	0.4195	0.9268	7056912	6674667	0.9458	23.5098X	43.111	0.8848	0.762	495034
1_15	10243670	9888992	0.9654	1536550500(1.54G)	1480792404(1.48G)	0.9637	0.4325	0.8984	8917800	8556615	0.9595	30.2734X	44.1562	0.9188	0.8735	460389
1_16	7776896	7562826	0.9725	1166534400(1.17G)	1129543744(1.13G)	0.9683	0.3806	0.9279	6507377	6241557	0.9592	22.0975X	43.4918	0.8988	0.6132	501102
1_17	14087224	13738982	0.9753	2113083600(2.11G)	2049924124(2.05G)	0.9701	0.4566	0.9235	11339524	10855384	0.9573	38.3336X	43.616	0.9179	0.8872	348843
1_18	9997668	9761612	0.9764	1499650200(1.50G)	1456836722(1.46G)	0.9715	0.4202	0.9259	8227560	7913885	0.9619	28.0126X	43.8569	0.9306	0.8547	364059
1_19	11913262	11420524	0.9586	1786989300(1.79G)	1710413234(1.71G)	0.9571	0.441	0.8925	10258845	9734340	0.9489	34.2543X	43.6775	0.8909	0.8502	594995
1_2	10312140	10106074	0.98	1546821000(1.55G)	1502956554(1.50G)	0.9716	0.4322	0.9282	8434810	8009408	0.9496	28.1164X	43.2428	0.8932	0.8187	533013
1_4	10757310	10387416	0.9656	1613596500(1.61G)	1555301200(1.56G)	0.9639	0.4998	0.8941	9092677	8654174	0.9518	30.4921X	43.8563	0.9079	0.8727	458676
1_5	8458882	8192686	0.9685	1268832300(1.27G)	1222198252(1.22G)	0.9632	0.4135	0.9276	6927567	6556919	0.9465	23.0953X	42.9652	0.8893	0.7415	499978
1_6	9539508	8906264	0.9336	1430926200(1.43G)	1334606484(1.33G)	0.9327	0.4064	0.8872	8043269	7639729	0.9498	26.9887X	43.4822	0.904	0.816	591069
1_7	13542780	13254192	0.9787	2031417000(2.03G)	1973589242(1.97G)	0.9715	0.4161	0.9264	10980246	10643553	0.9693	37.6936X	44.0582	0.9374	0.9045	310193
1_9	8379314	8061488	0.9621	1256897100(1.26G)	1207153282(1.21G)	0.9604	0.4316	0.8968	7240210	6922816	0.9562	24.4396X	43.6071	0.9094	0.8265	548594
2_1	7524882	7307064	0.9711	1128732300(1.13G)	1090438360(1.09G)	0.9661	0.444	0.9244	6127232	5748782	0.9382	20.1543X	43.0783	0.8915	0.7393	626226
2_10	16355096	15641066	0.9563	2453264400(2.45G)	2336418894(2.34G)	0.9524	0.387	0.9215	12335462	11625913	0.9425	41.0605X	42.8788	0.8953	0.845	584943
2_11	10805828	10367896	0.9595	1620874200(1.62G)	1553292010(1.55G)	0.9583	0.4597	0.8908	9286523	8955600	0.9644	31.8298X	44.3594	0.9396	0.9128	296263
2_12	9601424	9201132	0.9583	1440213600(1.44G)	1378373526(1.38G)	0.9571	0.4092	0.8961	8338465	7959019	0.9545	28.16X	43.891	0.9028	0.8304	499726
2_13	9469926	9072426	0.958	1420488900(1.42G)	1358903598(1.36G)	0.9566	0.4065	0.8947	8274367	7910760	0.9561	27.9638X	43.8036	0.9016	0.8145	549058
2_14	10690816	10459358	0.9783	1603622400(1.60G)	1561312640(1.56G)	0.9736	0.393	0.9277	8886913	8394270	0.9446	29.5935X	42.9037	0.8741	0.7666	583245
2_18	9663408	9267836	0.9591	1449511200(1.45G)	1387846696(1.39G)	0.9575	0.4311	0.8951	8349566	8061774	0.9655	28.5756X	43.9936	0.9162	0.8676	435955
2_19	7858452	7556826	0.9616	1178767800(1.18G)	1131780424(1.13G)	0.9601	0.3921	0.8994	6848642	6536700	0.9545	23.0732X	43.3738	0.8778	0.701	646664
2_2	12632260	12429692	0.984	1894839000(1.89G)	1853785296(1.85G)	0.9783	0.3936	0.9345	10563505	10108534	0.9569	35.6768X	43.7403	0.8919	0.8281	528352
2_3	11452364	10628062	0.928	1717854600(1.72G)	1592343076(1.59G)	0.9269	0.4718	0.882	9340215	8770916	0.939	30.7699X	43.5285	0.9015	0.8555	649287
2_4	14076350	13492416	0.9585	2111452500(2.11G)	2016566292(2.02G)	0.9551	0.4489	0.8938	12092477	11745222	0.9713	41.6996X	44.5942	0.9482	0.9304	315649
2_6	8793640	8576368	0.9753	1319046000(1.32G)	1281905910(1.28G)	0.9718	0.4395	0.9247	7201671	6835101	0.9491	24.1252X	43.3899	0.8958	0.8104	536406
2_7	9931094	9680426	0.9748	1489664100(1.49G)	1446906344(1.45G)	0.9713	0.4268	0.9255	8165893	7777264	0.9524	27.4725X	43.3418	0.8981	0.8283	461439
2_9	8875898	8549120	0.9632	1331384700(1.33G)	1279284000(1.28G)	0.9609	0.4242	0.8989	7708393	7306054	0.9478	25.7185X	43.3712	0.8973	0.8115	569255
3_10	9819722	9516436	0.9691	1472958300(1.47G)	1421839662(1.42G)	0.9653	0.4236	0.9236	7979034	7502445	0.9403	26.3672X	42.8351	0.8829	0.7984	616161
3_11	9303380	8881378	0.9546	1395507000(1.40G)	1330535246(1.33G)	0.9534	0.4284	0.8915	8035090	7701034	0.9584	27.2334X	43.5176	0.9028	0.8425	498336
3_12	13306086	13073526	0.9825	1995912900(2.00G)	1948599746(1.95G)	0.9763	0.4274	0.9304	10862768	10396108	0.957	36.6716X	43.4581	0.9095	0.8703	433968
3_13	10096206	9658732	0.9567	1514430900(1.51G)	1447367716(1.45G)	0.9557	0.4432	0.8905	8718897	8322408	0.9545	29.3717X	43.8263	0.9101	0.8618	518425
3_14	8421430	8078452	0.9593	1263214500(1.26G)	1209967888(1.21G)	0.9578	0.4197	0.8961	7339878	7027121	0.9574	24.8676X	43.3645	0.8998	0.8065	421256
3_15	10254880	9837338	0.9593	1538232000(1.54G)	1473587340(1.47G)	0.958	0.4237	0.8961	8923859	8533512	0.9563	30.1218X	43.9347	0.9038	0.8467	568627
3_16	12229908	11520072	0.942	1834486200(1.83G)	1724194392(1.72G)	0.9399	0.4185	0.8922	10263188	9742355	0.9493	34.1994X	43.3276	0.8761	0.8209	634904
3_17	8306076	7967126	0.9592	1245911400(1.25G)	1189790290(1.19G)	0.955	0.4175	0.8983	7229875	6855148	0.9482	24.0645X	43.3716	0.892	0.7719	605185
3_18	7520038	7203760	0.9579	1128005700(1.13G)	1077565564(1.08G)	0.9553	0.459	0.8945	6448274	6137348	0.9518	21.6428X	43.5926	0.9244	0.8266	371085
3_19	13177278	12893402	0.9785	1976591700(1.98G)	1926600672(1.93G)	0.9747	0.4282	0.9258	10876066	10315871	0.9485	36.3982X	43.6982	0.9027	0.8609	507301
3_2	9691822	9453596	0.9754	1453773300(1.45G)	1410698160(1.41G)	0.9704	0.3856	0.9276	8156231	7843983	0.9617	27.8098X	43.2242	0.9152	0.7771	377905
3_3	8199692	7826200	0.9545	1229953800(1.23G)	1172213002(1.17G)	0.9531	0.433	0.8921	7078897	6699152	0.9464	23.5996X	43.0139	0.8984	0.7978	473600
3_4	8967982	8643742	0.9638	1345197300(1.35G)	1294097276(1.29G)	0.962	0.4006	0.9011	7865968	7453757	0.9476	26.4036X	43.8332	0.9355	0.8111	412718
3_5	10707868	10489630	0.9796	1606180200(1.61G)	1567700630(1.57G)	0.976	0.3804	0.9293	8976715	8648824	0.9635	30.692X	43.796	0.9115	0.8087	453772
3_8	8411848	8119468	0.9652	1261777200(1.26G)	1212388608(1.21G)	0.9609	0.4227	0.9215	6878852	6526544	0.9488	23.0189X	42.8969	0.8919	0.7687	455110
3_9	13710312	13432576	0.9797	2056546800(2.06G)	2001147400(2.00G)	0.9731	0.4317	0.926	11249295	10822551	0.9621	38.2948X	43.7813	0.9249	0.8937	312805
4_1	8193938	7944440	0.9696	1229090700(1.23G)	1187534742(1.19G)	0.9662	0.4344	0.9252	6611387	6347945	0.9602	22.4978X	44.0087	0.9269	0.8083	370854
4_10	13609900	13169734	0.9677	2041485000(2.04G)	1970739588(1.97G)	0.9653	0.4597	0.8978	11720932	11211090	0.9565	39.6X	44.3831	0.9255	0.9031	457431
4_11	10512550	10267252	0.9767	1576882500(1.58G)	1529677808(1.53G)	0.9701	0.4355	0.9273	8602631	8233291	0.9571	29.062X	43.6511	0.9185	0.861	393678
4_12	10827052	10489450	0.9688	1624057800(1.62G)	1568928832(1.57G)	0.9661	0.4462	0.9015	9364999	8898555	0.9502	31.34X	43.661	0.9174	0.8651	490273
4_13	10016994	9768056	0.9751	1502549100(1.50G)	1457930770(1.46G)	0.9703	0.4676	0.9249	8022494	7554197	0.9416	26.5986X	43.6839	0.9401	0.8647	326313
4_15	10270846	10089514	0.9823	1540626900(1.54G)	1506538888(1.51G)	0.9779	0.3737	0.9371	8720297	8136982	0.9331	28.8781X	44.1823	0.9464	0.7575	302854
4_16	10309668	9992192	0.9692	1546450200(1.55G)	1494106648(1.49G)	0.9662	0.417	0.9041	9020129	8571419	0.9503	30.1604X	43.2551	0.8852	0.8082	615688
4_17	10401150	10174316	0.9782	1560172500(1.56G)	1515959196(1.52G)	0.9717	0.3996	0.9313	8547838	8279999	0.9687	29.3475X	44.4477	0.957	0.835	280714
4_18	9814330	9478686	0.9658	1472149500(1.47G)	1418769934(1.42G)	0.9637	0.4437	0.8992	8541773	8074527	0.9453	28.3064X	43.5563	0.8825	0.8248	678797
4_19	12280078	11878962	0.9673	1842011700(1.84G)	1778865198(1.78G)	0.9657	0.4707	0.8968	10437616	10094018	0.9671	35.7833X	44.318	0.9304	0.9046	382638
4_3	10306246	10088570	0.9789	1545936900(1.55G)	1503922156(1.50G)	0.9728	0.45	0.9251	8404427	7800383	0.9281	27.5461X	43.4706	0.9358	0.8731	259514
4_4	10076872	9685800	0.9612	1511530800(1.51G)	1450211598(1.45G)	0.9594	0.4591	0.8951	8606129	8132790	0.945	28.7567X	44.2115	0.9225	0.8801	422219
4_7	10261396	10028394	0.9773	1539209400(1.54G)	1495156388(1.50G)	0.9714	0.4499	0.9256	8417918	7908661	0.9395	27.6969X	43.0302	0.8891	0.8252	607197
4_8	11227796	10876710	0.9687	1684169400(1.68G)	1627193124(1.63G)	0.9662	0.4593	0.8999	9661213	9099038	0.9418	31.85X	43.394	0.8847	0.8359	689839
4_9	9909600	9563144	0.965	1486440000(1.49G)	1431546002(1.43G)	0.9631	0.4459	0.8982	8613582	8227043	0.9551	29.0809X	43.82	0.9144	0.8673	463546
5_10	10495730	10062964	0.9588	1574359500(1.57G)	1507041200(1.51G)	0.9572	0.4602	0.8917	8979505	8752351	0.9747	31.2116X	44.4229	0.9566	0.9327	206396
5_11	9025678	8681860	0.9619	1353851700(1.35G)	1299949642(1.30G)	0.9602	0.445	0.8957	7775297	7484442	0.9626	26.5549X	43.6029	0.9321	0.8789	308979
5_12	8802658	8401270	0.9544	1320398700(1.32G)	1258282626(1.26G)	0.953	0.444	0.8796	7572856	7261238	0.9589	25.7317X	43.7382	0.9211	0.8614	396788
5_13	10247982	9830596	0.9593	1537197300(1.54G)	1472782512(1.47G)	0.9581	0.4482	0.8929	8861771	8407881	0.9488	29.609X	43.617	0.9001	0.8477	576366
5_14	10104506	9724992	0.9624	1515675900(1.52G)	1456282202(1.46G)	0.9608	0.44	0.8956	8779451	8368511	0.9532	29.5089X	44.0259	0.9056	0.854	557644
5_15	12245220	11407014	0.9315	1836783000(1.84G)	1700989952(1.70G)	0.9261	0.3365	0.9236	9249876	8909964	0.9633	31.5011X	42.7263	0.8807	0.6954	495383
5_16	9397672	9018272	0.9596	1409650800(1.41G)	1349941168(1.35G)	0.9576	0.431	0.8947	8124922	7808278	0.961	27.6604X	44.011	0.9404	0.8471	293545
5_17	9869794	9419470	0.9544	1480469100(1.48G)	1411149958(1.41G)	0.9532	0.4672	0.8878	8367407	7963446	0.9517	28.0636X	43.5831	0.9036	0.8638	500961
5_18	14884600	14221064	0.9554	2232690000(2.23G)	2127003872(2.13G)	0.9527	0.4548	0.9137	11911246	11336968	0.9518	40.0321X	43.7489	0.9091	0.8723	503459
5_19	17355830	16739896	0.9645	2603374500(2.60G)	2493242462(2.49G)	0.9577	0.4494	0.9213	13718896	13238014	0.9649	46.773X	43.7426	0.9298	0.9056	327995
5_2	9792112	9440668	0.9641	1468816800(1.47G)	1413580456(1.41G)	0.9624	0.4826	0.8949	8395854	7885450	0.9392	27.561X	43.4003	0.8752	0.8273	646551
5_3	7646920	7160980	0.9365	1147038000(1.15G)	1068936894(1.07G)	0.9319	0.4387	0.9134	6083443	5747304	0.9447	20.3904X	44.4407	0.9509	0.7947	173866
5_4	10961278	10111428	0.9225	1644191700(1.64G)	1497471072(1.50G)	0.9108	0.4584	0.9174	8373196	7952212	0.9497	27.823X	43.7676	0.9298	0.8758	321864
5_5	13823216	12413284	0.898	2073482400(2.07G)	1839419404(1.84G)	0.8871	0.4042	0.9193	10590791	10109633	0.9546	35.3535X	43.7326	0.9094	0.8567	574424
5_6	8322918	7960954	0.9565	1248437700(1.25G)	1192710370(1.19G)	0.9554	0.4459	0.891	7190238	6819985	0.9485	24.0426X	43.4232	0.8984	0.8275	526981
5_7	11389382	10955536	0.9619	1708407300(1.71G)	1640488722(1.64G)	0.9602	0.4533	0.8939	9814182	9251742	0.9427	32.5463X	43.2392	0.8916	0.8446	561352
5_8	8542520	8178068	0.9573	1281378000(1.28G)	1224793600(1.22G)	0.9558	0.4671	0.8899	7316099	7026004	0.9603	24.839X	43.7477	0.9185	0.8678	421805
5_9	18667184	17940258	0.9611	2800077600(2.80G)	2649763702(2.65G)	0.9463	0.4563	0.9219	14877850	14134294	0.95	49.2322X	43.78	0.906	0.8728	505479
6_1	14491760	13886638	0.9582	2173764000(2.17G)	2078174770(2.08G)	0.956	0.4683	0.8917	12408482	11741576	0.9463	41.2497X	43.4728	0.9039	0.8696	560535
6_10	12928562	12226482	0.9457	1939284300(1.94G)	1827717496(1.83G)	0.9425	0.4135	0.9143	10250987	9789043	0.9549	34.737X	43.5035	0.9216	0.8801	342717
6_11	13481664	12632056	0.937	2022249600(2.02G)	1887059740(1.89G)	0.9331	0.3596	0.9231	10356578	9820392	0.9482	34.734X	43.5111	0.8947	0.8045	517434
6_12	14058386	13411178	0.954	2108757900(2.11G)	2008675760(2.01G)	0.9525	0.4626	0.8885	12032855	11368796	0.9448	39.9123X	43.3062	0.8889	0.8489	595028
6_14	17379924	16492280	0.9489	2606988600(2.61G)	2459690632(2.46G)	0.9435	0.4255	0.9222	13810288	13180488	0.9544	46.5043X	43.8039	0.9348	0.895	460021
6_15	17400272	16510990	0.9489	2610040800(2.61G)	2463554636(2.46G)	0.9439	0.4079	0.9251	13791157	13215185	0.9582	46.7128X	43.5185	0.9236	0.8874	483945
6_16	15876808	14610332	0.9202	2381521200(2.38G)	2173310298(2.17G)	0.9126	0.4426	0.9179	12147389	11476453	0.9448	40.2759X	43.3955	0.913	0.8779	518274
6_17	13656738	13048114	0.9554	2048510700(2.05G)	1952660238(1.95G)	0.9532	0.4513	0.8927	11709273	11180899	0.9549	39.4586X	43.8489	0.9216	0.882	462728
6_18	20309864	19576992	0.9639	3046479600(3.05G)	2925929978(2.93G)	0.9604	0.4759	0.8967	17338031	16327979	0.9417	57.1273X	43.4837	0.9021	0.8743	622626
6_19	11792902	11312618	0.9593	1768935300(1.77G)	1691644890(1.69G)	0.9563	0.4204	0.898	10242523	9712594	0.9483	34.1543X	43.6109	0.9259	0.8453	515152
6_2	13518168	12958364	0.9586	2027725200(2.03G)	1934666110(1.93G)	0.9541	0.4295	0.9195	10784976	10161251	0.9422	35.7519X	43.2375	0.8927	0.8479	538210
6_3	27617568	26344792	0.9539	4142635200(4.14G)	3943396936(3.94G)	0.9519	0.4545	0.9015	22894657	21692752	0.9475	76.5057X	44.0033	0.9907	0.9693	489995
6_4	11594116	11075028	0.9552	1739117400(1.74G)	1658152638(1.66G)	0.9534	0.4382	0.8915	10004239	9465655	0.9462	33.2862X	43.4671	0.9024	0.8503	636219
6_8	11781314	11220444	0.9524	1767197100(1.77G)	1680162602(1.68G)	0.9507	0.446	0.8898	10121635	9766960	0.965	34.7227X	44.3304	0.9429	0.9143	319630
6_9	12367714	11811704	0.955	1855157100(1.86G)	1767843960(1.77G)	0.9529	0.4572	0.8903	10582726	9865120	0.9322	34.4979X	42.8732	0.8873	0.8365	711566
7_1	13204250	11956074	0.9055	1980637500(1.98G)	1784801720(1.78G)	0.9011	0.4207	0.9133	10155938	9610126	0.9463	33.788X	42.781	0.8923	0.8369	497648
7_10	14498418	13740080	0.9477	2174762700(2.17G)	2054283000(2.05G)	0.9446	0.4319	0.9143	11649949	10868043	0.9329	38.1447X	43.0016	0.8888	0.8462	667998
7_12	12809024	12113142	0.9457	1921353600(1.92G)	1801829498(1.80G)	0.9378	0.391	0.9238	10171823	9558030	0.9397	33.4973X	42.666	0.8805	0.8104	623330
7_13	17568416	16953094	0.965	2635262400(2.64G)	2536227754(2.54G)	0.9624	0.4202	0.9012	15337826	14611003	0.9526	51.4514X	43.938	0.9016	0.8673	636284
7_14	13436928	12840466	0.9556	2015539200(2.02G)	1914921240(1.91G)	0.9501	0.474	0.9164	10658728	10185359	0.9556	35.904X	43.6574	0.9122	0.8829	408907
7_15	14458196	13865934	0.959	2168729400(2.17G)	2075294454(2.08G)	0.9569	0.4353	0.8944	12497584	11903621	0.9525	41.9783X	43.3639	0.9014	0.8651	506651
7_17	10867494	10335344	0.951	1630124100(1.63G)	1546749878(1.55G)	0.9489	0.4244	0.9126	8778189	8378447	0.9545	29.6445X	43.478	0.9099	0.8578	448887
7_18	12685078	12133416	0.9565	1902761700(1.90G)	1816667678(1.82G)	0.9548	0.4311	0.8928	10964894	10534924	0.9608	37.3573X	43.762	0.9217	0.8921	340156
7_19	11292110	10776706	0.9544	1693816500(1.69G)	1610407548(1.61G)	0.9508	0.4239	0.8943	9812532	9365312	0.9544	33.0198X	43.3517	0.9077	0.8558	494576
7_2	10995604	9966072	0.9064	1649340600(1.65G)	1489056866(1.49G)	0.9028	0.4079	0.9139	8511482	8274749	0.9722	29.4341X	44.1946	0.9437	0.8798	253527
7_4	14387228	13793246	0.9587	2158084200(2.16G)	2061162910(2.06G)	0.9551	0.456	0.8955	12254118	11746357	0.9586	41.4529X	43.6141	0.9093	0.8762	372519
7_5	16716476	15842314	0.9477	2507471400(2.51G)	2352015416(2.35G)	0.938	0.4345	0.9247	13061713	12457652	0.9538	43.7233X	43.6474	0.9525	0.8848	320377
7_7	13835522	12875922	0.9306	2075328300(2.08G)	1920260100(1.92G)	0.9253	0.4563	0.9113	10834458	10200018	0.9414	35.7964X	43.1648	0.9126	0.8775	495174
7_8	11520342	10918076	0.9477	1728051300(1.73G)	1629043468(1.63G)	0.9427	0.389	0.9217	9410041	8727780	0.9275	31.0001X	43.9756	0.9502	0.8543	242607
7_9	14823316	14203800	0.9582	2223497400(2.22G)	2124397234(2.12G)	0.9554	0.4745	0.8913	12703020	11930318	0.9392	41.7514X	43.3557	0.8935	0.855	585322
8_1	12390274	11570984	0.9339	1858541100(1.86G)	1719739378(1.72G)	0.9253	0.3906	0.9167	9944795	9513095	0.9566	33.4586X	42.8919	0.9033	0.8323	490477
8_10	11373722	10850604	0.954	1706058300(1.71G)	1621920666(1.62G)	0.9507	0.404	0.9149	9352704	8964759	0.9585	31.7849X	43.4967	0.9153	0.8569	388455
8_11	12405312	11753862	0.9475	1860796800(1.86G)	1757734636(1.76G)	0.9446	0.4588	0.9123	9886869	9285016	0.9391	32.646X	43.165	0.8928	0.8467	524436
8_12	11611740	11053478	0.9519	1741761000(1.74G)	1647165844(1.65G)	0.9457	0.438	0.913	9452953	8876630	0.939	31.0208X	42.8518	0.8854	0.8328	705956
8_14	18431456	17921508	0.9723	2764718400(2.76G)	2669766886(2.67G)	0.9657	0.4214	0.9226	15166291	14327788	0.9447	50.2655X	42.8946	0.8918	0.8528	610051
8_15	11682926	11187854	0.9576	1752438900(1.75G)	1671565834(1.67G)	0.9539	0.4039	0.915	9622898	9322663	0.9688	33.0885X	43.5543	0.9298	0.8747	370616
8_16	11093474	10564972	0.9524	1664021100(1.66G)	1581881996(1.58G)	0.9506	0.4432	0.8888	9519711	9065956	0.9523	31.9555X	43.7488	0.9099	0.8718	507783
8_17	15524398	14812162	0.9541	2328659700(2.33G)	2217247934(2.22G)	0.9522	0.4528	0.8891	13299345	12578554	0.9458	44.2291X	43.1971	0.9022	0.8689	505691
8_18	12849348	12353546	0.9614	1927402200(1.93G)	1849142030(1.85G)	0.9594	0.4499	0.8939	11144148	10523960	0.9443	36.9045X	43.4077	0.8885	0.8461	580687
8_19	12170702	11650780	0.9573	1825605300(1.83G)	1742987436(1.74G)	0.9547	0.4564	0.8921	10436921	10092605	0.967	35.8008X	44.4104	0.9396	0.9146	295522
8_2	12939048	12321210	0.9523	1940857200(1.94G)	1844447452(1.84G)	0.9503	0.4526	0.8884	11105595	10601902	0.9546	37.4119X	43.7144	0.914	0.8794	501343
8_3	9464036	9069012	0.9583	1419605400(1.42G)	1356056192(1.36G)	0.9552	0.4204	0.9141	7778616	7483160	0.962	26.5935X	43.8571	0.9237	0.8455	299069
8_4	11084190	10451352	0.9429	1662628500(1.66G)	1562099456(1.56G)	0.9395	0.4075	0.918	8955140	8438853	0.9423	29.6889X	42.5633	0.8779	0.7966	650662
8_5	11642958	10937332	0.9394	1746443700(1.75G)	1633433670(1.63G)	0.9353	0.4057	0.9152	9332279	8887555	0.9523	31.3546X	43.4866	0.9004	0.8381	571418
8_6	11918294	11382494	0.955	1787744100(1.79G)	1704315228(1.70G)	0.9533	0.4566	0.8917	10215256	9864881	0.9657	34.9488X	44.05	0.9192	0.8871	427138
8_7	14710108	14055618	0.9555	2206516200(2.21G)	2103262658(2.10G)	0.9532	0.4449	0.8921	12633747	12142724	0.9611	42.9847X	43.7578	0.9328	0.9064	388979
8_8	13357338	12799340	0.9582	2003600700(2.00G)	1916079206(1.92G)	0.9563	0.4271	0.8934	11604625	11053664	0.9525	38.9594X	43.6888	0.9004	0.8571	603307
8_9	11747490	11048130	0.9405	1762123500(1.76G)	1639570330(1.64G)	0.9305	0.4262	0.9176	9338756	8818404	0.9443	30.8263X	42.8541	0.891	0.8339	569235
He911_4	69062382	66748696	0.9665	10359357300(10.36G)	10000416210(10.00G)	0.9654	0.445	0.912	46897039	40103330	0.8551	137.7315X	41.0525	0.8543	0.8075	1031059
